# Supplementary material
Source: HighWire-hosted journal article supplement (https://oem.bmj.com/content/77/10/713)
Supplement: inline-supplementary-material-3 [file inline-supplementary-material-3.pdf]

## Online appendix 5: Analysis of variance for exposure and outcome variables

| Parameter                                                 | $\sigma^2_{\text{Tot}}$ | $\sigma^2_{\text{BF}}$ | $\sigma^2_{\text{BP}}$ | $\sigma^2_{\text{WP}}$ | $(\sigma^2_{\text{WP}})/(\sigma^2_{\text{BF}} + \sigma^2_{\text{BP}})$ |
|-----------------------------------------------------------|-------------------------|------------------------|------------------------|------------------------|------------------------------------------------------------------------|
| <b>log(HbA<sub>1c</sub> [mmol/mol])</b><br>< LOQ excluded | 0.053                   | 0.000                  | 0.028                  | 0.025                  | 0.870                                                                  |
| <b>log(HbA<sub>1c</sub> [mmol/mol])</b><br>< LOQ imputed  | 0.065                   | 0.009                  | 0.028                  | 0.028                  | 0.736                                                                  |
| <b>log(FPG [mmol/L])</b>                                  | 0.022                   | 0.000                  | 0.010                  | 0.012                  | 1.277                                                                  |
| <b>AChE [U/mL]</b>                                        | 0.307                   | 0.018                  | 0.219                  | 0.070                  | 0.295                                                                  |
| <b>Hb [g/dL]</b>                                          | 1.917                   | 0.433                  | 0.853                  | 0.631                  | 0.490                                                                  |
| <b>AChE/Hb [U/g]</b>                                      | 15.818                  | 0.000                  | 12.923                 | 2.894                  | 0.224                                                                  |

For HbA<sub>1c</sub> and FPG, variances have been calculated on the log scale, as the variables were lognormal.

### Legend

- $\sigma^2_{\text{Tot}}$  = total variance
- $\sigma^2_{\text{BF}}$  = between-family variance
- $\sigma^2_{\text{BP}}$  = between-person variance
- $\sigma^2_{\text{WP}}$  = within-person variance
- $(\sigma^2_{\text{WP}})/(\sigma^2_{\text{BF}} + \sigma^2_{\text{BP}})$  = ratio between within-person variance and the sum of the between-family and between-person variances.
