# Supplementary material
Source: HighWire-hosted journal article supplement (https://oem.bmj.com/content/77/10/713)
Supplement: inline-supplementary-material-4 [file inline-supplementary-material-4.pdf]

## Online appendix 3: Pesticide use statistics based on questionnaire data

| Compound                                     |                              | Phase 1                        |                         | Phase 2                        |                         | Phase 3                        |                         |           |
|----------------------------------------------|------------------------------|--------------------------------|-------------------------|--------------------------------|-------------------------|--------------------------------|-------------------------|-----------|
|                                              |                              | Ever used<br>n (%)             | Used last week<br>n (%) | Used since last phase<br>n (%) | Used last week<br>n (%) | Used since last phase<br>n (%) | Used last week<br>n (%) |           |
| Any pesticide                                |                              | 283 (77.7%)                    | 80 (22.0%)              | 173 (48.6%)                    | 77 (21.6%)              | 133 (37.6%)                    | 71 (20.1%)              |           |
| Any organophosphate or carbamate insecticide |                              | 133 (36.5%)                    | 22 (6.0%)               | 43 (12.1%)                     | 15 (4.2%)               | 40 (11.3%)                     | 20 (5.6%)               |           |
| Insecticide                                  | Organophosphate              | Chlorpyrifos                   | 8 (2.2%)                | 3 (0.8%)                       | 3 (0.8%)                | 0 (0.0%)                       | 1 (0.3%)                | 0 (0.0%)  |
|                                              |                              | Diazinon                       | 1 (0.3%)                | 0 (0.0%)                       | 0 (0.0%)                | 0 (0.0%)                       | 1 (0.3%)                | 0 (0.0%)  |
|                                              |                              | Dichlorvos                     | 16 (4.4%)               | 4 (1.1%)                       | 6 (1.7%)                | 3 (0.8%)                       | 10 (2.8%)               | 6 (1.7%)  |
|                                              |                              | Dimethoate                     | 11 (3.0%)               | 1 (0.3%)                       | 5 (1.4%)                | 2 (0.6%)                       | 1 (0.3%)                | 1 (0.3%)  |
|                                              |                              | Profenofos                     | 114 (31.3%)             | 15 (4.1%)                      | 30 (8.4%)               | 10 (2.8%)                      | 30 (8.5%)               | 14 (4.0%) |
|                                              | Organophosphate + pyrethroid | Chlorpyrifos + cypermethrin    | 0 (0.0%)                | 0 (0.0%)                       | 1 (0.3%)                | 1 (0.3%)                       | 2 (0.6%)                | 2 (0.6%)  |
|                                              | Carbamate                    | Bendiocarb                     | 1 (0.3%)                | 0 (0.0%)                       | 0 (0.0%)                | 0 (0.0%)                       | 0 (0.0%)                | 0 (0.0%)  |
|                                              |                              | Carbofuran                     | 2 (0.5%)                | 0 (0.0%)                       | 0 (0.0%)                | 0 (0.0%)                       | 0 (0.0%)                | 0 (0.0%)  |
|                                              | Pyrethroid                   | Alpha-cypermethrin             | 5 (1.4%)                | 2 (0.5%)                       | 1 (0.3%)                | 1 (0.3%)                       | 1 (0.3%)                | 1 (0.3%)  |
|                                              |                              | Cypermethrin                   | 108 (29.7%)             | 22 (6.0%)                      | 45 (12.6%)              | 18 (5.1%)                      | 37 (10.5%)              | 18 (5.1%) |
|                                              |                              | Deltamethrin                   | 3 (0.8%)                | 0 (0.0%)                       | 1 (0.3%)                | 1 (0.3%)                       | 0 (0.0%)                | 0 (0.0%)  |
|                                              |                              | Lambda-cyhalothrin             | 4 (1.1%)                | 0 (0.0%)                       | 3 (0.8%)                | 2 (0.6%)                       | 3 (0.8%)                | 1 (0.3%)  |
|                                              |                              | Unknown pyrethroid insecticide | 1 (0.3%)                | 0 (0.0%)                       | 0 (0.0%)                | 0 (0.0%)                       | 0 (0.0%)                | 0 (0.0%)  |
|                                              | Avermectin + neonicotinoid   | Abamectin + Acetamiprid        | 5 (1.4%)                | 3 (0.8%)                       | 11 (3.1%)               | 6 (1.7%)                       | 4 (1.1%)                | 1 (0.3%)  |
|                                              | Neonicotinoid                | Imidacloprid                   | 0 (0.0%)                | 0 (0.0%)                       | 1 (0.3%)                | 1 (0.3%)                       | 0 (0.0%)                | 0 (0.0%)  |
| Octopamine receptor agonist                  | Amitraz                      | 0 (0.0%)                       | 0 (0.0%)                | 2 (0.6%)                       | 1 (0.3%)                | 2 (0.6%)                       | 2 (0.6%)                |           |
| Azadirachtin                                 | Azadirachtin                 | 1 (0.3%)                       | 1 (0.3%)                | 3 (0.8%)                       | 2 (0.6%)                | 0 (0.0%)                       | 0 (0.0%)                |           |
| Unknown                                      | Unknown insecticide          | 28 (7.7%)                      | 10 (2.7%)               | 42 (11.8%)                     | 18 (5.1%)               | 29 (8.2%)                      | 17 (4.8%)               |           |
| Herbicide                                    | 2,4-D                        | 49 (13.5%)                     | 9 (2.5%)                | 15 (4.2%)                      | 5 (1.4%)                | 7 (2.0%)                       | 3 (0.8%)                |           |
|                                              | Atrazine                     | 1 (0.3%)                       | 0 (0.0%)                | 0 (0.0%)                       | 0 (0.0%)                | 0 (0.0%)                       | 0 (0.0%)                |           |
|                                              | Glyphosate                   | 157 (43.1%)                    | 24 (6.6%)               | 55 (15.4%)                     | 16 (4.5%)               | 29 (8.2%)                      | 13 (3.7%)               |           |
|                                              | Paraquat                     | 9 (2.5%)                       | 1 (0.3%)                | 1 (0.3%)                       | 1 (0.3%)                | 3 (0.8%)                       | 1 (0.3%)                |           |
|                                              | Unknown herbicide            | 1 (0.3%)                       | 1 (0.3%)                | 0 (0.0%)                       | 0 (0.0%)                | 0 (0.0%)                       | 0 (0.0%)                |           |
| Fungicide                                    | Mancozeb                     | 46 (12.6%)                     | 15 (4.1%)               | 30 (8.4%)                      | 18 (5.1%)               | 27 (7.6%)                      | 22 (6.2%)               |           |
|                                              | Propamocarb hydrochloride    | 0 (0.0%)                       | 0 (0.0%)                | 0 (0.0%)                       | 0 (0.0%)                | 1 (0.3%)                       | 0 (0.0%)                |           |
|                                              | Unknown fungicide            | 0 (0.0%)                       | 0 (0.0%)                | 1 (0.3%)                       | 1 (0.3%)                | 0 (0.0%)                       | 0 (0.0%)                |           |
| Unknown                                      | Sulphur                      | 0 (0.0%)                       | 0 (0.0%)                | 1 (0.3%)                       | 0 (0.0%)                | 0 (0.0%)                       | 0 (0.0%)                |           |
|                                              | Unknown pesticide            | 22 (6.0%)                      | 7 (1.9%)                | 24 (6.7%)                      | 11 (3.1%)               | 18 (5.1%)                      | 7 (2.0%)                |           |

All percentages are relative to the number of participants in each phase (364 in phase 1, 356 in phase 2, and 354 in phase 3).

Participants who reported having used/mixed any pesticides were asked which up to three pesticides they had used/mixed the most, and if they had used/mixed the compounds in the week prior to the interview. Participants also were asked for up to three additional pesticides that they had used/mixed in the last week. Showcards of trade names of commonly used pesticides in the study area were used to improve recall.
